# Supplementary material for: Imaging Effector Memory T-Cells Predicts Response to PD1-Chemotherapy Combinations in Colon Cancer
Source: MDPI journal article supplement (doi:10.3390/biomedicines10102343), 2022-09-20
Supplement: s1 [file s1]

# Imaging effector memory T-cells predicts response to PD1-chemotherapy combinations in colon cancer.

Julian L. Goggi <sup>1,\*</sup>, Shivashankar Khanapur <sup>1</sup>, Siddesh V. Hartimath <sup>1</sup>, Boominathan Ramasamy <sup>1</sup>, Peter Cheng <sup>1</sup>, Hui-Xian Chin <sup>2</sup>, Jun-Rong Tang <sup>1</sup>, You-Yi Hwang <sup>2</sup> and Edward G. Robins <sup>1,3</sup>

<sup>1</sup> Institute of Bioengineering and Bioimaging (IBB), Agency for Science, Technology and Research (A\*STAR), 11 Biopolis Way, #01-02 Helios, 138667, Singapore

<sup>2</sup> Singapore Immunology Network (SigN), Agency for Science, Technology and Research (A\*STAR), 8A Biomedical Grove, Immunos, 138648, Singapore

<sup>3</sup> Clinical Imaging Research Centre (CIRC), Yong Loo Lin School of Medicine, National University of Singapore, 14 Medical Drive, #B1-01, 117599, Singapore

\* Correspondence: julian\_goggi@ibb.a-star.edu.sg; Tel.: +65-6824-7093

**Citation:** Goggi, J.L.; Khanapur, S.; Hartimath, S.V.; Ramasamy, B.; Cheng, P.; Chin, H.X.; Tang, J.R.; Ong S.T.; Hwang Y.Y.; et al. *Biomedicines* **2022**, *10*, x.  
https://doi.org/10.3390/xxxxx

Academic Editor(s):

Received:

Accepted:

Published: date

**Publisher's Note:** MDPI stays neutral with regard to jurisdictional claims in published maps and institutional affiliations.

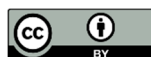

**Copyright:** © 2022 by the authors. Submitted for possible open access publication under the terms and conditions of the Creative Commons Attribution (CC BY) license (<https://creativecommons.org/licenses/by/4.0/>).

## Supplementary Materials

### 1.1 Flow Cytometry Markers

Kv1.3 (Kv1.3 potassium channel marker - polyclonal FITC; Sigma-Aldrich), CD103 (epithelial cell and DC subset marker - clone M290 FITC; BD Biosciences), CD25 (IL2 receptor marker - clone PC61 BB700; BD Biosciences), CD45 (pan-leukocyte marker - clone 30-F11 BUV395; BD Biosciences, New Hampshire, USA), Fixable Live/Dead Blue (Invitrogen, Singapore), CD62L (naïve T cell marker - clone MEL-14 BUV563; BD Biosciences), CD86 (macrophage marker - clone GL1 BUV615; BD Biosciences), F4/80 (pan-macrophage marker - clone T45-2342; BD Biosciences), NKp46 (pan-NK cell marker - clone 29A1.4 BUV737; BD Biosciences), CD3 (pan-T cell marker - clone 500A2 BUV805; BD Biosciences), FoxP3 (T regulatory cell marker - clone 150D AlexaFluor647; Biolegend, San Diego, CA, USA), CD44 (stem cell and T activation marker - clone IM7 APC-R700; BD Biosciences), CD11b (myeloid marker - clone M1/70 APC-Cy7; Biolegend), Granzyme B (Granzyme B marker - clone QA16A02 PE; Biolegend), CCR7 (memory T cell marker - clone 4B12 PE-CF594; BD Biosciences), CD19 (pan-B cell marker - clone 6D5 PE-Cy5; Biolegend), CD206 (macrophage marker - clone C068C2 PE-Cy7; Biolegend), CD127 (IL7 receptor alpha chain, memory and effector T cell marker - clone SB/199 BV421; BD Biosciences), Ly6G (neutrophil marker - clone 1A8 BV480; BD Biosciences), CD8 (cytotoxic T cell marker - clone 53-6.7 BV510; BD Biosciences), CD11c (dendritic cell marker - clone N418 BV570; Biolegend), Ly6C (macrophage marker - clone HK1.4 BV605; Biolegend), Siglec F (eosinophil marker - clone E50-2440 BV650, BD Biosciences), CD68 (macrophage marker - clone FA-11 BV711; Biolegend), CD4 (helper T cell marker - clone GK1.5 BV750; BD Biosciences), I-A/I-E (MHC class II marker - clone M5/114.15.2 BV785; Biolegend).

### 1.2 Dimension reduction analysis

t-Distributed Stochastic Neighbor Embedding (t-SNE) was used for unbiased dimension reduction and Rphenograph was used for clustering. t-SNE, clustering and overlay with t-SNE maps were performed with the cytofkit package in RStudio (3) (<https://github.com/JinmiaoChenLab/cytofkit>). The default cytofkit parameters was used for the analysis on 1000 cells from each fcs file. Rphenograph clustering was performed for the following markers: Kv1.3, CD3, CD4, CD8, CD11b, CD11c, CD206, F4/80, Granzyme B, I-A/I-E, Ly6C, Ly6G, Nkp46 and Siglec-F.

Tables

| Treatment arm                                          | Days post inoculation | Tumour volume (mm <sup>3</sup> ± SD) |
|--------------------------------------------------------|-----------------------|--------------------------------------|
| <b>Control</b>                                         | 6                     | 149.16 ± 17.29                       |
|                                                        | 9                     | 299.44 ± 59.94                       |
|                                                        | 12                    | 888.38 ± 283.37                      |
|                                                        | 15                    | 1228.32 ± 355.74                     |
|                                                        | 18                    | 1511.52 ± 403.46                     |
|                                                        | 21                    | 1803.16 ± 459.17                     |
| <b><u>Treatment Responders (TR)</u></b><br><b>αPD1</b> | 6                     | 143.90 ± 23.09                       |
|                                                        | 9                     | 294.83 ± 44.63                       |
|                                                        | 12                    | 342.27 ± 150.07                      |
|                                                        | 15                    | 355.91 ± 185.23                      |
|                                                        | 18                    | 368.84 ± 228.10                      |
|                                                        | 21                    | 383.77 ± 261.91                      |
| <b>OXA</b>                                             | 6                     | 149.00 ± 19.04                       |
|                                                        | 9                     | 193.43 ± 87.07                       |
|                                                        | 12                    | 340.67 ± 201.33                      |
|                                                        | 15                    | 354.82 ± 225.13                      |
|                                                        | 18                    | 369.07 ± 250.03                      |
|                                                        | 21                    | 392.26 ± 283.33                      |
| <b>αPD1 + OXA</b>                                      | 6                     | 155.37 ± 24.55                       |
|                                                        | 9                     | 254.93 ± 15.90                       |
|                                                        | 12                    | 244.61 ± 84.58                       |
|                                                        | 15                    | 237.02 ± 150.24                      |
|                                                        | 18                    | 259.50 ± 183.87                      |
|                                                        | 21                    | 266.64 ± 181.08                      |
| <b>5-FU</b>                                            | 6                     | 148.00 ± 18.03                       |
|                                                        | 9                     | 233.99 ± 47.05                       |
|                                                        | 12                    | 313.17 ± 83.97                       |
|                                                        | 15                    | 349.16 ± 127.94                      |
|                                                        | 18                    | 406.71 ± 209.68                      |
|                                                        | 21                    | 456.27 ± 266.19                      |
| <b>αPD1 + 5-FU</b>                                     | 6                     | 149.03 ± 19.45                       |
|                                                        | 9                     | 184.36 ± 45.37                       |
|                                                        | 12                    | 201.36 ± 93.22                       |
|                                                        | 15                    | 212.93 ± 124.58                      |
|                                                        | 18                    | 243.62 ± 189.36                      |
|                                                        | 21                    | 245.01 ± 182.66                      |
| <b><u>Treatment Non Responders</u></b><br><b>(TNR)</b> | 6                     | 148.77 ± 13.28                       |
|                                                        | 9                     | 319.74 ± 69.34                       |

|  |    |                  |
|--|----|------------------|
|  | 12 | 648.90 ± 171.26  |
|  | 15 | 858.82 ± 239.00  |
|  | 18 | 1130.50 ± 296.91 |
|  | 21 | 1344.91 ± 359.75 |

**Supplementary Table S1.** Summary of tumour volumes in controls, ICI treatment responders (TR) and treatment non-responders (TNR).

|                            | Treatment Responders (TR)/<br>Treatment Non-Responders (TNR)<br>(No. mice) |
|----------------------------|----------------------------------------------------------------------------|
| <b>ICI Treatment</b>       | <b>CT26</b>                                                                |
| Control                    | 0/10                                                                       |
| αPD1                       | 6/15                                                                       |
| OXA                        | 7/10                                                                       |
| αPD1 + OXA                 | 8/10                                                                       |
| 5-FU                       | 6/10                                                                       |
| αPD1 + 5-FU                | 7/10                                                                       |
| % Overall Therapy Response | 61.8%                                                                      |

**Supplementary Table S2.** Summary of ICI treatment responders (TR) and treatment non-responders (TNR) across all therapy arms in syngeneic CT26 and MC38 colon cancer models

| Treatment arm | %TGI (mean ± SD) |
|---------------|------------------|
| αPD1          | 85.82 ± 15.83    |
| OXA           | 85.30 ± 17.13    |
| αPD1 + OXA    | 92.89 ± 18.80    |
| 5-FU          | 81.43 ± 16.09    |
| αPD1 + 5-FU   | 94.20 ± 12.86    |
| TNR           | 27.71 ± 21.75    |

**Supplementary Table S3.** Tumour growth inhibition % on day 21 for each treatment arm compared to control.

A

|                    | CD4 <sup>+</sup> % of CD3 <sup>+</sup> | CD4 <sup>+</sup> Teff% of CD4 <sup>+</sup> | CD4 <sup>+</sup> T <sub>CM</sub> % of CD4 <sup>+</sup> | CD4 <sup>+</sup> Treg % of CD4 <sup>+</sup> |
|--------------------|----------------------------------------|--------------------------------------------|--------------------------------------------------------|---------------------------------------------|
| <b>Control</b>     | 39.33 ± 9.97                           | 48.41 ± 17.47                              | 9.40 ± 5.32                                            | 11.78 ± 3.96                                |
| <b>TR</b>          |                                        |                                            |                                                        |                                             |
| <b>αPD1</b>        | 25.85 ± 4.37                           | 20.86 ± 12.90                              | 25.64 ± 2.26                                           | 23.76 ± 7.84 **                             |
| <b>OXA</b>         | 12.78 ± 4.39                           | 17.95 ± 16.12                              | 27.20 ± 9.54                                           | 29.24 ± 6.91 **                             |
| <b>αPD1 + OXA</b>  | 28.35 ± 10.20                          | 24.91 ± 12.91                              | 22.98 ± 7.23                                           | 24.63 ± 4.58 **                             |
| <b>5-FU</b>        | 64.94 ± 4.25                           | 45.85 ± 13.01                              | 8.54 ± 3.45                                            | 10.25 ± 4.27                                |
| <b>αPD1 + 5-FU</b> | 62.32 ± 5.71                           | 40.65 ± 12.09                              | 14.41 ± 5.92                                           | 16.21 ± 1.88 *                              |
| <b>TNR</b>         | 41.89 ± 3.98                           | 53.34 ± 10.28                              | 6.20 ± 3.75                                            | 11.94 ± 1.12                                |

B

|                    | CD8 <sup>+</sup> Teff% of CD8 <sup>+</sup> | CD8 <sup>+</sup> T <sub>CM</sub> % of CD8 <sup>+</sup> | F4/80 <sup>+</sup> % of CD45 <sup>+</sup> | Eos % of CD45 <sup>+</sup> |
|--------------------|--------------------------------------------|--------------------------------------------------------|-------------------------------------------|----------------------------|
| <b>Control</b>     | 34.74 ± 6.80                               | 1.01 ± 0.35                                            | 6.00 ± 1.43                               | 1.07 ± 0.15                |
| <b>TR</b>          |                                            |                                                        |                                           |                            |
| <b>αPD1</b>        | 52.86 ± 16.73 *                            | 2.29 ± 1.09                                            | 3.94 ± 1.33                               | 1.73 ± 0.30                |
| <b>OXA</b>         | 66.32 ± 11.76 *                            | 0.64 ± 0.43                                            | 2.34 ± 1.11 *                             | 0.94 ± 0.34                |
| <b>αPD1 + OXA</b>  | 58.86 ± 17.30 *                            | 1.25 ± 0.77                                            | 3.31 ± 1.32 *                             | 1.42 ± 0.51                |
| <b>5-FU</b>        | 51.97 ± 10.37 *                            | 1.97 ± 1.12                                            | 2.15 ± 1.01 *                             | 2.14 ± 0.50 *              |
| <b>αPD1 + 5-FU</b> | 46.84 ± 9.22 *                             | 2.18 ± 1.52                                            | 1.69 ± 1.05 *                             | 2.54 ± 0.67 *              |
| <b>TNR</b>         | 32.57 ± 7.60                               | 1.06 ± 0.85                                            | 6.28 ± 1.12                               | 0.98 ± 0.33                |

**Supplementary Table S4.** Table showing the tumour associated immune cell populations from CT26 tumour-bearing mice at day 12 post-induction of αPD1 monotherapy or combination therapies. **A.** Percentages of CD4<sup>+</sup>, CD4<sup>+</sup> T-effector, CD4<sup>+</sup> T-central memory and CD4<sup>+</sup> T-regulatory immune cell subpopulations and **B.** Percentages of CD8<sup>+</sup> T-effector, CD8<sup>+</sup> T-central memory, F4/80<sup>+</sup> and Eos<sup>+</sup> immune cell subpopulations are shown across control groups, treatment responders (TR) and treatment non-responders (TNR) across all treatment arms. Data are shown as mean % of cells ± S.D. and are representative of n=5-10 mice/ group, \*  $P < 0.05$ ; \*\*  $P < 0.01$  comparing TR to TNR.

| Treatment arm          | Days post inoculation | Tumour volume (mm <sup>3</sup> ± SD) |
|------------------------|-----------------------|--------------------------------------|
| <b>Reimplanted TNR</b> | 22                    | 120.45 ± 12.17                       |
|                        | 27                    | 207.51 ± 15.43                       |
|                        | 30                    | 269.28 ± 9.67                        |
|                        | 34                    | 384.46 ± 215.10                      |
|                        | 37                    | 593.31 ± 338.70 *                    |
| <b>Reimplanted TR</b>  | 22                    | 112.64 ± 24.74                       |
|                        | 27                    | 195.65 ± 65.88                       |

|  |    |                |
|--|----|----------------|
|  | 30 | 176.49 ± 39.94 |
|  | 34 | 229.97 ± 47.02 |
|  | 37 | 235.49 ± 24.34 |

**Supplementary Table S5.** Summary of tumour volumes in reimplanted TNRs and reimplanted TRs. Data are displayed as mean ± S.D. (TR, treated responder; TNR, treated non-responder) and are representative of n=4-6 mice/ group, \* *P*<0.05 comparing TR to TNR

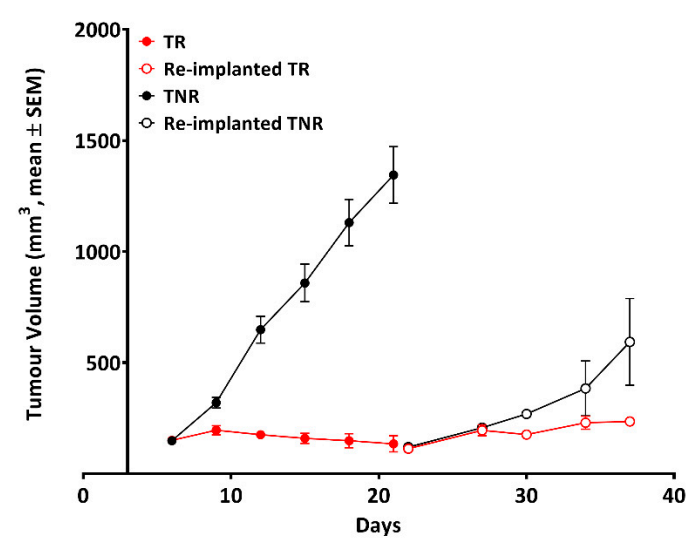

**Supplementary Figure S1.** Average tumour volumes showing initial tumour growth (TR, red closed circles and TNR, closed black circles) and after CT26 tumour cell re-implantation subcutaneously into the contralateral shoulder of TRs (red open circles; animals with high [<sup>18</sup>F]AIF-NOTA-KCNA3P uptake >0.8%ID/g) or TNRs (black open circles; animals with low [<sup>18</sup>F]AIF-NOTA-KCNA3P uptake <0.5%ID/g). Data are displayed as mean ± S.E.M. (TR, treated responder; TNR, treated non-responder).
